# Supplementary material for: Biocatalytic conversion of ethylene to ethylene oxide using an engineered toluene monooxygenase
Source: Royal Society of Chemistry journal article supplement (doi:10.1039/c4cc08802f), 2015-01-01
Supplement: c4cc08802f1.pdf [file c4cc08802f1.pdf]

## GC program

An Agilent 7820A gas chromatograph equipped with an Agilent HP-5 30m x 0.320mm x 0.25  $\mu$ m column was used for detection of ethylene and ethylene oxide in the headspace of sealed culture vials. For quantitation, 500  $\mu$ L of headspace was manually injected. An injector temperature of 105  $^{\circ}$ C and a split ratio of 50:1 were used, and oven temperature was held at 30  $^{\circ}$ C for 5 min, and flame ionization detector was held at 200  $^{\circ}$ C. Our lower limit of detection from a 0.5mL culture in a 2mL vial was 3.5 $\mu$ M.

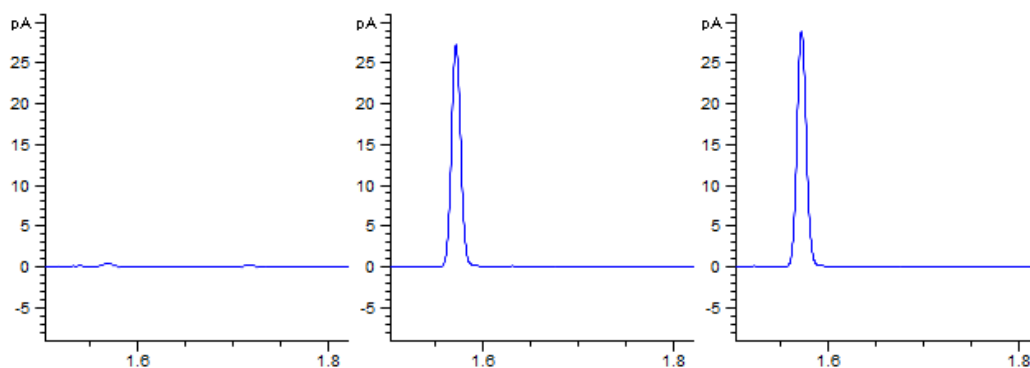

**Supplemental figure 1.** Example set of GC-FID traces illustrating a negative control (cells only), a positive control (cells spiked with 100  $\mu$ M oxirane, Sigma part #48838, transfer done in cold room), and a product response. Retention times are in minutes.
